# Supplementary material for: A tubulin alpha 8 mouse knockout model indicates a likely role in spermatogenesis but not in brain development
Source: PubMed Central journal article supplement (PMC5384676; doi:10.1371/journal.pone.0174264), 2017-04-07

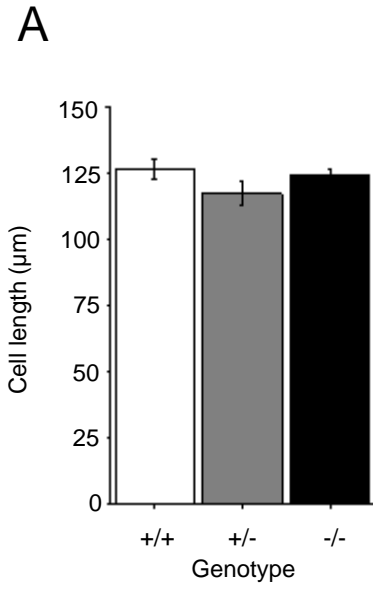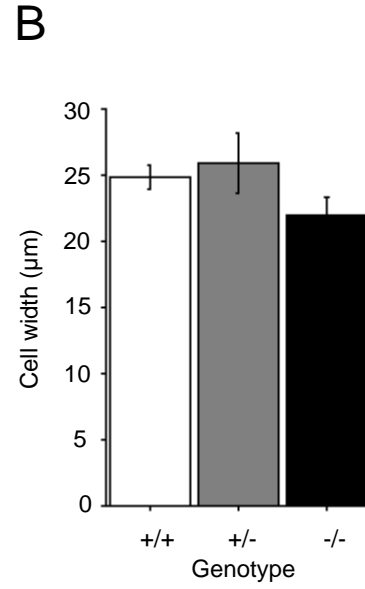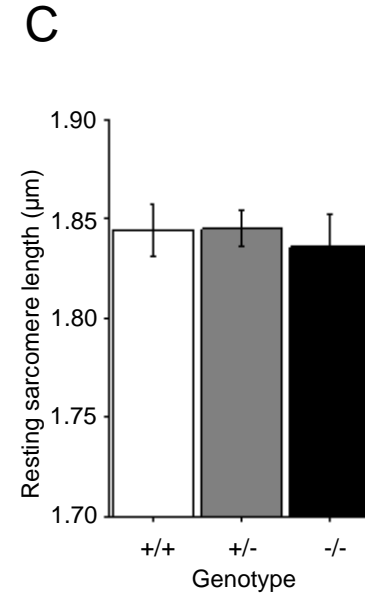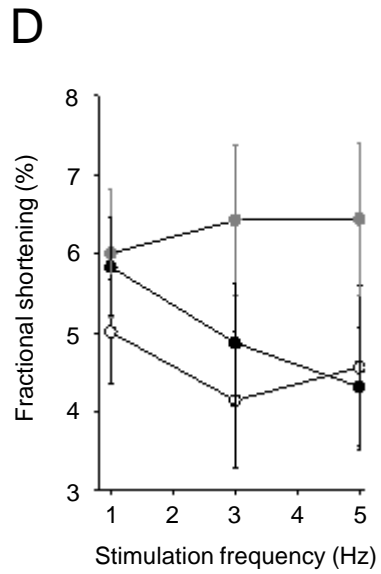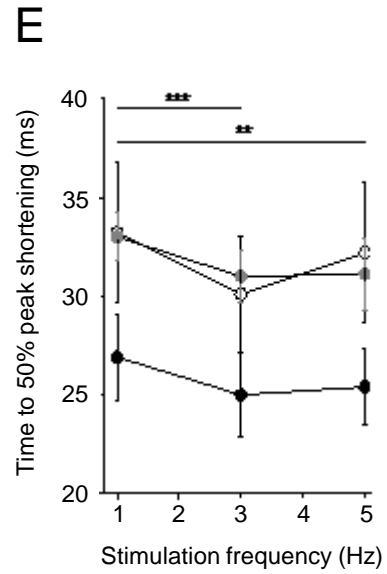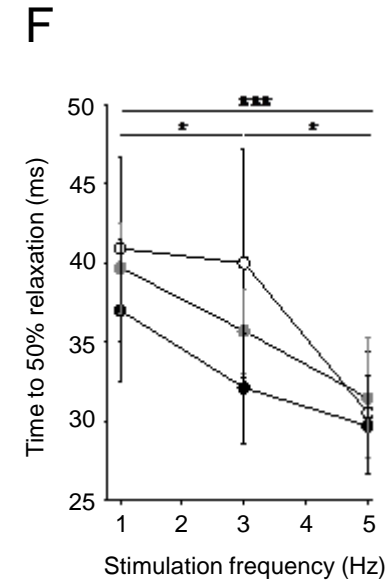

Supplement: pone.0174264.s008.pdf [file pone.0174264.s008.pdf]
