# Supplementary material for: A tubulin alpha 8 mouse knockout model indicates a likely role in spermatogenesis but not in brain development
Source: PubMed Central journal article supplement (PMC5384676; doi:10.1371/journal.pone.0174264), 2017-04-07
Supplement: pone.0174264.s010.pdf [file pone.0174264.s010.pdf]

**S2 Table. Variant count for each patient following sequential filtering criteria**

| <b>Filtering criteria</b>                                                                                        | <b>Sample 1</b> | <b>Sample 2</b> |
|------------------------------------------------------------------------------------------------------------------|-----------------|-----------------|
| Total variant count                                                                                              | 33,283          | 33,951          |
| Exons and splice site variants (+/- 20bp)                                                                        | 30,223          | 30,875          |
| Homozygous variants located in the autozygous region reported in Abdollahi et al 2009. (chr22:17841068-25248310) | 80              | 82              |
| Exclusion of variants with a dbSNP or NHLBI GO Exome Sequencing Project MAF $\geq 0.01$                          | 15              | 17              |
